# Supplementary material for: Differential Expression of miRNAs in the Respiratory Tree of the Sea Cucumber Apostichopus japonicus Under Hypoxia Stress
Source: PubMed Central journal article supplement (PMC5677170; doi:10.1534/g3.117.1129), 2017-09-15
Supplement: 3681TableS1.pdf [file 3681TableS1.pdf]

Table S1 Selected miRNAs and their primer sequences used for real-time PCR

| MiRNAs name             | Primer sequence (5'to3')                                                  |
|-------------------------|---------------------------------------------------------------------------|
| Aja-miR-2013-3p         | R: GCGCGT GAGCAGGCTGGAGAA ATTAACCA CGCGC AACACC<br>F: CGTGCAGCATGATGTAG   |
| Aja-miR-125-5p          | R: GCGCGT GAGCAGGCTGGAGAA ATTAACCA CGCGC TCACAA<br>F: GTCCTGAGACCCTAAC    |
| Aja-miR-200-3p          | R: GCGCGT GAGCAGGCTGGAGAA ATTAACCA CGCGC CATCATC<br>F: CGGTAATACTGTCTGGTG |
| Aja-miR-71-5p           | R: GCGCGT GAGCAGGCTGGAGAA ATTAACCA CGCGC TCTCAC<br>F: GCTGAAAGACATGGGTAG  |
| Aja-miR-10              | R: GCGCGT GAGCAGGCTGGAGAA ATTAACCA CGCGC ACAAAT<br>F: CGTACCCTGTAGATCCG   |
| Aja-miR-1               | R: GCGCGT GAGCAGGCTGGAGAA ATTAACCA CGCGC ATACTTC<br>F: GCGGTGGAATGTAAAG   |
| Aja-miR-2008            | R: GCGCGT GAGCAGGCTGGAGAA ATTAACCA CGCGC TCGTAT<br>F: TCAGCCTCGCTGTCAA    |
| Aja-miR-31-5p           | R: GCGCGTGAGCAGGCTGGAGAA ATTAACCA CGCGC AGCTATG<br>F: TAGGCAAGATGTTGGC    |
| Aja-miR-184             | R: GCGCGT GAGCAGGCTGGAGAA ATTAACCA CGCGC ACTTATC<br>F: GGTGGACGGAGAACTG   |
| Aja-miR-153             | R: GCGCGT GAGCAGGCTGGAGAA ATTAACCA CGCGC CTGTCA<br>F: GGCCTCTCTCTCTCTG    |
| Aja-miR-153-3p          | R: GCGCGT GAGCAGGCTGGAGAA ATTAACCA CGCGC AATCAC<br>F: AGTTGCATAGTCACAAAAG |
| novel-miR-1             | R: GCGCGT GAGCAGGCTGGAGAA ATTAACCA CGCGC TCAACA<br>F: GTGGCACGTGACTTTG    |
| novel-miR-2             | R: GCGCGT GAGCAGGCTGGAGAA ATTAACCA CGCGC GGATCTG<br>F: CCAAAGAAAGCCTCTAAC |
| novel-miR-3             | R: GCGCGT GAGCAGGCTGGAGAA ATTAACCA CGCGC TTTCAG<br>F: ATCAAAGGTTGAGGGC    |
| Aja-cytochrome b (CYTB) | R: AAAAGGGAAAAGGAAGTGAAG<br>F: TTTCTGAGCCGCAACAGTAATC                     |
| universal R primer      | GAGCAGGCTGGAGAA                                                           |
